# Supplementary material for: Total Knee Arthroplasty After Ipsilateral Below-knee Amputation: A Review of the Literature and Surgical Techniques
Source: PubMed Central journal article supplement (PMC9234005; doi:10.1016/j.artd.2022.03.020), 2022-06-17
Supplement: mmc1.pdf [file mmc1.pdf]

# CONFLICT OF INTEREST STATEMENT

## *American Association of Hip and Knee Surgeons*

(Adopted from the American Academy of Orthopaedic Surgeons disclosure statement)

The following form **must be filled out completely and submitted by each author (example, 6 authors, 6 forms).**  
**All items require a response. If there is no relevant disclosure for a given item, enter "None."**

### **Total knee arthroplasty after ipsilateral below knee amputation: A case report and review of the literature**

---

Manuscript Title

1. Royalties from a company or supplier (The following conflicts were disclosed)  
None
2. Speakers bureau/paid presentations for a company or supplier (The following conflicts were disclosed)  
none
- 3A. Paid employee for a company or supplier (The following conflicts were disclosed)  
none
- 3B. Paid consultant for a company or supplier (The following conflicts were disclosed)  
none
- 3C. Unpaid consultants for a company or supplier (The following conflicts were disclosed)  
none
4. Stock or stock options in a company or supplier (The following conflicts were disclosed)  
none
5. Research support from a company or supplier as a Principal Investigator (The following conflicts were disclosed)  
none
6. Other financial or material support from a company or supplier (The following conflicts were disclosed)  
none
7. Royalties, financial or material support from publishers (The following conflicts were disclosed)  
JBJS, Elsevier
8. Medical/Orthopaedic publications editorial/governing board (The following conflicts were disclosed)  
Arthroplasty Today  
Journal of Arthroplasty
9. Board member/committee appointments for a society (The following conflicts were disclosed)  
AAHKS Young Arthroplasty Group  
AAHKS Nominating Committee  
RJOS Education Committee

### **Each author must sign AND print or type his/her name, date and submit a separate form**

In addition, one BLINDED Conflict of Interest form (no author names used) should be submitted per manuscript with all author disclosures.

Anna Cohen-Rosenblum



1/2/21

---

Author Name (Print or Type)

Author Signature

Date
